# Supplementary material for: Economic burden of adult patients with β-thalassaemia major in mainland China
Source: Springer Nature journal article supplement (doi:10.1186/s13023-023-02858-4), 2023-08-29
Supplement: MOESM3 [file 13023_2023_2858_MOESM3_ESM.pdf]

This document certifies that the manuscript

## **Economic burden of adult patients with $\beta$ -thalassemia major in mainland China**

prepared by the authors

**Xuemei Zhen, Jing Ming, Runqi Zhang, Shuo Zhang, Jing Xie, Baoguo Liu, Zijing Wang,  
Xiaojie Sun, Lizheng Shi**

was edited for proper English language, grammar, punctuation, spelling, and overall style  
by one or more of the highly qualified native English speaking editors at AJE.

This certificate was issued on **February 10, 2023** and may be verified  
on the [AJE website](https://aje.com) using the verification code **D5DA-9302-27EE-37A5-2072**.

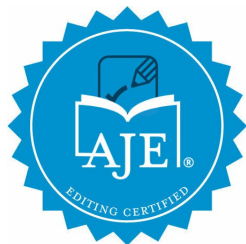

Neither the research content nor the authors' intentions were altered in any way during the editing process. Documents receiving this certification should be English-ready for publication; however, the author has the ability to accept or reject our suggestions and changes. To verify the final AJE edited version, please visit our verification page at [aje.com/certificate](https://aje.com/certificate). If you have any questions or concerns about this edited document, please contact AJE at [support@aje.com](mailto:support@aje.com).
